# Supplementary material for: MicroRNA Changes in Cerebrospinal Fluid After Subarachnoid Hemorrhage
Source: PubMed Central journal article supplement — Stroke. 2017 Aug 2;48(9):2391–8. doi: 10.1161/STROKEAHA.117.017804 (PMC5571886; doi:10.1161/strokeaha.117.017804), 2017-08-02
Supplement: str-48-2391-s002.pdf [file str-48-2391-s002.pdf]

# SUPPLEMENTAL MATERIAL

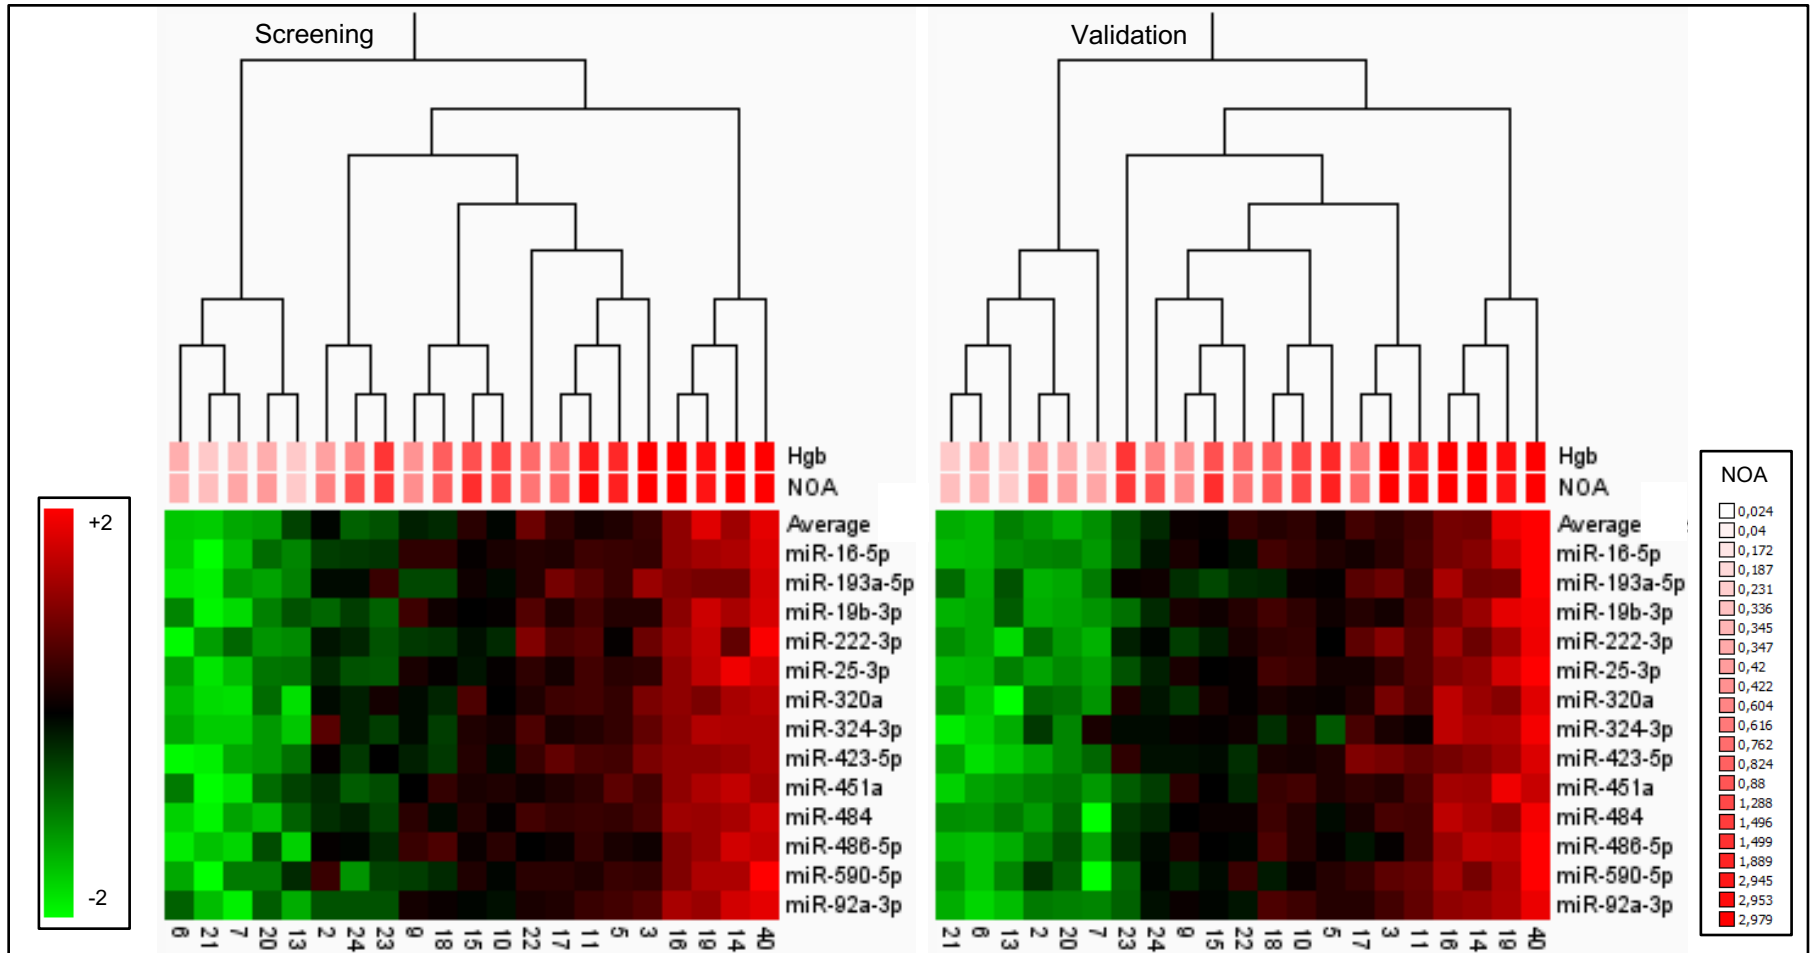

Supplemental Figure I - Hemolysis and miRNA correlation. One way hierarchically clustered relative differences of non normalized Cq values of the 13 miRNA most correlated ( $p < 0.0001$ , linear regression) to net oxyhemoglobin absorbance (NOA) in cerebrospinal fluid from SAH patients in both the screening and the validation study. Downregulation shown in green, upregulation in red (left color legend). High net absorbance shown in red, low in white.

**Hgb**, net absorbance of hemoglobin; **Average**, average quantification value of all miRNA targets for each sample.

Supplemental Table I  
Hemolysis and miRNA correlation

| MiRNA target     | p-value   |            |
|------------------|-----------|------------|
|                  | Screening | Validation |
| Average miRNA    | 5,98E-05  | 9,32E-05   |
| <b>miR-16-5p</b> | 1,72E-05  | 1,66E-05   |
| miR-193a-5p      | 4,88E-05  | 1,85E-06   |
| miR-19b-3p       | 7,73E-05  | 7,78E-05   |
| miR-222-3p       | 5,61E-05  | 1,11E-05   |
| miR-25-3p        | 3,41E-06  | 1,76E-05   |
| miR-320a         | 1,34E-05  | 3,53E-07   |
| miR-324-3p       | 6,11E-05  | 3,64E-05   |
| miR-423-5p       | 4,54E-05  | 2,70E-05   |
| <b>miR-451a</b>  | 5,49E-05  | 2,21E-05   |
| miR-484          | 2,65E-05  | 2,20E-06   |
| miR-486-5p       | 5,23E-05  | 3,54E-06   |
| miR-590-5p       | 3,97E-05  | 8,69E-06   |
| miR-92a-3p       | 6,40E-07  | 6,94E-06   |

P-values of the 13 miRNA most correlated (linear regression) to net oxyhemoglobin absorbance (NOA) in cerebrospinal fluid from SAH patients in both the screening (left column) and the validation study (right column). Average miRNA represents the quantification value of all miRNA targets for each sample. MiRNA highlighted in red are commonly used to evaluate hemolysis in serum and plasma samples.

**Supplemental Table II: Data related to the manuscript entitled: "MicroRNA changes in cerebrospinal fluid after subarachnoid hemorrhage." . Data shows fold change, p- and q-values for the 66 miRNA that exhibited an increase in CSF from SAH compared to neurologically healthy patients (p < 0.001) in both the screening and validation study.**

| MiRNA target    | Screening study |          |          | Validation study |          |          |
|-----------------|-----------------|----------|----------|------------------|----------|----------|
|                 | Fold change     | p-value  | q-value  | Fold change      | p-value  | q-value  |
| hsa-let-7b-5p   | 105,5           | 2,23E-08 | 3,88E-08 | 42,0             | 4,65E-09 | 9,59E-09 |
| hsa-miR-106a-5p | 56,1            | 1,08E-09 | 3,95E-09 | 153,5            | 6,91E-12 | 9,12E-11 |
| hsa-miR-125b-5p | 12,3            | 5,81E-06 | 6,50E-06 | 23,4             | 9,47E-08 | 1,56E-07 |
| hsa-miR-126-3p  | 96,4            | 1,51E-08 | 2,84E-08 | 119,1            | 2,69E-12 | 4,44E-11 |
| hsa-miR-1274B   | 103,1           | 2,65E-08 | 4,37E-08 | 19,2             | 5,20E-06 | 6,60E-06 |
| hsa-miR-130a-3p | 18,8            | 2,67E-07 | 3,52E-07 | 9,9              | 1,09E-05 | 1,27E-05 |
| hsa-miR-130b-3p | 87,5            | 2,43E-11 | 1,46E-10 | 4,8              | 6,82E-05 | 7,26E-05 |
| hsa-miR-132-3p  | 605,9           | 1,45E-15 | 3,18E-14 | 98,6             | 1,21E-11 | 9,77E-11 |
| hsa-miR-140-5p  | 70,1            | 5,67E-08 | 8,70E-08 | 11,9             | 2,06E-05 | 2,30E-05 |
| hsa-miR-142-3p  | 218,7           | 3,09E-12 | 4,07E-11 | 61,6             | 4,46E-10 | 1,40E-09 |
| hsa-miR-146a-5p | 28,7            | 1,04E-10 | 5,73E-10 | 19,3             | 1,25E-07 | 1,96E-07 |
| hsa-miR-150-5p  | 10,4            | 3,38E-09 | 8,09E-09 | 32,4             | 5,67E-10 | 1,70E-09 |
| hsa-miR-152-3p  | 9,2             | 1,22E-06 | 1,49E-06 | 12,6             | 6,78E-06 | 8,29E-06 |
| hsa-miR-15a-5p  | 36,1            | 1,05E-07 | 1,50E-07 | 61,4             | 1,99E-09 | 4,88E-09 |
| hsa-miR-15b-5p  | 818,6           | 5,18E-14 | 8,54E-13 | 53,0             | 1,53E-09 | 4,04E-09 |
| hsa-miR-16-5p   | 318,5           | 2,71E-10 | 1,23E-09 | 320,6            | 2,66E-12 | 4,44E-11 |
| hsa-miR-17-5p   | 67,1            | 1,65E-09 | 4,53E-09 | 3,8              | 7,59E-04 | 7,59E-04 |
| hsa-miR-185-5p  | 63,7            | 2,95E-09 | 7,48E-09 | 150,8            | 8,34E-12 | 9,17E-11 |
| hsa-miR-186-5p  | 31,9            | 1,61E-09 | 4,53E-09 | 10,2             | 9,42E-06 | 1,13E-05 |
| hsa-miR-191-5p  | 18,0            | 2,61E-08 | 4,37E-08 | 20,6             | 5,65E-07 | 7,76E-07 |
| hsa-miR-192-5p  | 3,8             | 2,93E-05 | 2,97E-05 | 18,7             | 3,27E-07 | 4,59E-07 |
| hsa-miR-197-3p  | 173,6           | 6,22E-12 | 5,25E-11 | 23,5             | 7,88E-09 | 1,58E-08 |
| hsa-miR-19a-3p  | 119,2           | 5,27E-07 | 6,56E-07 | 139,5            | 6,32E-11 | 2,98E-10 |
| hsa-miR-19b-3p  | 52,0            | 4,89E-10 | 2,02E-09 | 165,6            | 1,49E-11 | 9,77E-11 |
| hsa-miR-204-5p  | 7,0             | 1,37E-09 | 4,10E-09 | 10,8             | 1,04E-07 | 1,67E-07 |
| hsa-miR-20a-5p  | 17,1            | 1,97E-08 | 3,61E-08 | 134,5            | 1,49E-10 | 5,79E-10 |
| hsa-miR-21-5p   | 247,5           | 1,25E-15 | 3,18E-14 | 76,7             | 1,77E-13 | 8,69E-12 |
| hsa-miR-210-3p  | 312,0           | 1,50E-11 | 9,89E-11 | 39,0             | 3,47E-09 | 7,64E-09 |
| hsa-miR-221-3p  | 970,0           | 1,09E-16 | 7,21E-15 | 13,8             | 2,53E-08 | 4,52E-08 |
| hsa-miR-222-3p  | 6,0             | 1,25E-08 | 2,50E-08 | 78,6             | 2,63E-13 | 8,69E-12 |
| hsa-miR-223-3p  | 55,3            | 8,16E-12 | 5,99E-11 | 264,9            | 1,35E-09 | 3,88E-09 |
| hsa-miR-223-5p  | 161,8           | 2,47E-09 | 6,53E-09 | 9,6              | 8,90E-05 | 9,18E-05 |
| hsa-miR-24-3p   | 18,5            | 6,21E-08 | 9,31E-08 | 54,1             | 1,54E-08 | 2,90E-08 |
| hsa-miR-25-3p   | 22,3            | 8,13E-09 | 1,68E-08 | 164,1            | 1,69E-11 | 9,77E-11 |
| hsa-miR-26a-5p  | 14,6            | 2,77E-05 | 2,90E-05 | 12,8             | 2,83E-07 | 4,06E-07 |
| hsa-miR-26b-5p  | 38,8            | 3,43E-09 | 8,09E-09 | 15,5             | 8,70E-07 | 1,17E-06 |
| hsa-miR-27a-3p  | 60,5            | 1,34E-09 | 4,10E-09 | 68,2             | 9,29E-11 | 4,09E-10 |
| hsa-miR-28-3p   | 121,8           | 5,90E-10 | 2,29E-09 | 14,1             | 2,17E-06 | 2,86E-06 |
| hsa-miR-29a-3p  | 38,3            | 4,04E-07 | 5,22E-07 | 24,2             | 3,06E-08 | 5,31E-08 |
| hsa-miR-29c-3p  | 4,8             | 6,09E-06 | 6,59E-06 | 23,2             | 1,83E-07 | 2,82E-07 |
| hsa-miR-30a-5p  | 3,3             | 1,41E-05 | 1,50E-05 | 14,3             | 2,15E-07 | 3,15E-07 |
| hsa-miR-30b-5p  | 7,8             | 1,45E-08 | 2,81E-08 | 19,2             | 1,98E-09 | 4,88E-09 |

| MiRNA target   | Screening study |          |          | Validation study |          |          |
|----------------|-----------------|----------|----------|------------------|----------|----------|
|                | Fold change     | p-value  | q-value  | Fold change      | p-value  | q-value  |
| hsa-miR-30c-5p | 5,3             | 1,53E-07 | 2,10E-07 | 18,6             | 1,46E-09 | 4,01E-09 |
| hsa-miR-30d-5p | 3,6             | 2,82E-05 | 2,91E-05 | 67,4             | 1,78E-11 | 9,77E-11 |
| hsa-miR-320a   | 30,7            | 1,25E-09 | 4,10E-09 | 28,8             | 2,74E-09 | 6,44E-09 |
| hsa-miR-324-3p | 64,9            | 2,06E-08 | 3,67E-08 | 22,5             | 2,09E-08 | 3,83E-08 |
| hsa-miR-324-5p | 52,7            | 1,31E-09 | 4,10E-09 | 10,3             | 3,44E-05 | 3,72E-05 |
| hsa-miR-331-3p | 13,0            | 5,92E-06 | 6,51E-06 | 7,2              | 8,77E-05 | 9,18E-05 |
| hsa-miR-335-5p | 38,3            | 7,96E-08 | 1,17E-07 | 14,0             | 1,89E-07 | 2,84E-07 |
| hsa-miR-342-3p | 74,4            | 4,76E-07 | 6,05E-07 | 17,4             | 6,66E-06 | 8,29E-06 |
| hsa-miR-34b-3p | 7,9             | 4,97E-06 | 5,65E-06 | 6,2              | 1,13E-05 | 1,29E-05 |
| hsa-miR-34c-5p | 20,9            | 7,66E-09 | 1,63E-08 | 10,4             | 2,73E-05 | 3,01E-05 |
| hsa-miR-361-5p | 39,9            | 2,46E-07 | 3,32E-07 | 23,2             | 1,44E-08 | 2,79E-08 |
| hsa-miR-423-5p | 58,7            | 5,50E-09 | 1,25E-08 | 19,2             | 8,35E-08 | 1,41E-07 |
| hsa-miR-451a   | 277,5           | 6,97E-09 | 1,53E-08 | 268,1            | 4,25E-10 | 1,40E-09 |
| hsa-miR-484    | 70,1            | 2,79E-10 | 1,23E-09 | 42,4             | 3,15E-10 | 1,15E-09 |
| hsa-miR-486-5p | 129,0           | 3,54E-08 | 5,69E-08 | 93,6             | 2,83E-09 | 6,44E-09 |
| hsa-miR-532-3p | 64,7            | 1,39E-07 | 1,95E-07 | 32,9             | 1,69E-11 | 9,77E-11 |
| hsa-miR-532-5p | 344,1           | 5,06E-12 | 5,25E-11 | 22,5             | 3,98E-09 | 8,48E-09 |
| hsa-miR-574-3p | 15,6            | 6,10E-04 | 6,10E-04 | 12,3             | 2,77E-06 | 3,58E-06 |
| hsa-miR-590-5p | 6,5             | 2,66E-06 | 3,08E-06 | 49,3             | 4,01E-10 | 1,39E-09 |
| hsa-miR-660-5p | 183,4           | 6,37E-12 | 5,25E-11 | 35,5             | 1,32E-10 | 5,46E-10 |
| hsa-miR-92a-3p | 7,0             | 4,42E-08 | 6,94E-08 | 113,2            | 1,31E-11 | 9,77E-11 |
| hsa-miR-93-3p  | 73,9            | 1,28E-06 | 1,53E-06 | 5,9              | 6,39E-04 | 6,48E-04 |
| hsa-miR-93-5p  | 323,1           | 2,24E-10 | 1,14E-09 | 109,1            | 3,39E-11 | 1,72E-10 |
| hsa-miR-99b-5p | 18,1            | 1,59E-06 | 1,87E-06 | 9,9              | 1,09E-05 | 1,27E-05 |
